# Supplementary material for: Assessing field performance of ultrasensitive rapid diagnostic tests for malaria: a systematic review and meta-analysis
Source: Springer Nature journal article supplement (doi:10.1186/s12936-021-03783-2), 2021-06-03
Supplement: MOESM1 [file 19226128]

# Field performances of malaria ultrasensitive rapid diagnostic tests: a systematic review and meta-analysis

## Additional file

---

### Additional Tables

|                                                               |   |
|---------------------------------------------------------------|---|
| Additional file 1: Table S 1. Search strategy for PubMed..... | 2 |
|---------------------------------------------------------------|---|

Additional file 1: Table S 1. Search strategy for PubMed

| <b>Search</b> | <b>Search terms</b>                                                                                                                        |
|---------------|--------------------------------------------------------------------------------------------------------------------------------------------|
| #1            | "Malaria"[tiab] OR " Malaria"[MESH]                                                                                                        |
| #2            | "ultrasensitive"[tiab] OR "highly sensitive" [tiab] OR "hypersensitive"[tiab] OR "high-sensitive"[tiab] OR "high sensitive"[tiab] OR "RDT" |
| #3            | #1 AND #2                                                                                                                                  |
